# Supplementary material
Source: Springer Nature journal article supplement (https://www.springermedizin.de/resource/supplementary/13054_2012_668_MOESM2_ESM.pdf/9708958)
Supplement: MOESM2 [file 9708958]

Studies with out-of-hospital resuscitation after trauma were identified after the search strategy for medical databases (Table 1)

Primary screening

*Inclusion criteria:*

Out-of-hospital resuscitation after trauma AND admission to a clinic, Language of the article English or German

*Exclusion criteria:*

Resuscitation without trauma, preclinical death

**476 studies met primary inclusion criteria**

Secondary screening by 2 independent reviewers with full-text articles

Number of studies and reasons for exclusion from analysis

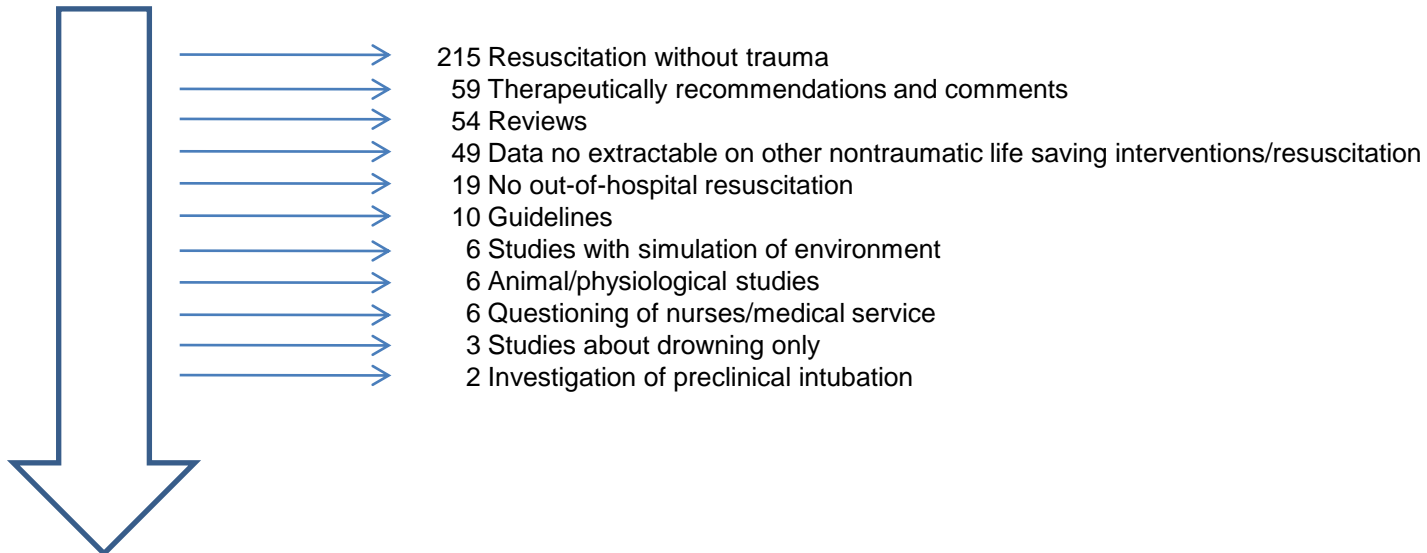

**=> 47 remaining studies (including 13 pediatric studies)**
